# Supplementary material for: Artificial FLOwering plants in Reducing Anxiety and depressive symptoms following Acute Coronary Syndromes (A-FLORA-ACS): a randomised controlled trial
Source: Springer Nature journal article supplement (doi:10.1007/s00380-018-1314-2), 2018-12-11
Supplement: MOESM1 [file 16332362]

**Flower Trial– Inclusion and Exclusion Criteria**

**INCLUSION**

- Age greater than 18 years old
- Written informed consent
- Diagnosis of a STEMI or NSTEMI (troponin-positive ACS), treated with percutaneous coronary intervention (PCI)
- Documented coronary artery disease on coronary angiography or cardiac CT >/= 50% stenosis

**EXCLUSION**

- Patients undergoing coronary artery bypass grafting (CABG) instead of PCI
- Life-threatening coexisting disease with a life expectancy of less than 1 year
- Patients with severe psychiatric illness or mental developmental delay that may preclude providing informed consent
- Patients without significant coronary stenosis or with imaging features suggestive of non-type I MI (such as Takotsubo cardiomyopathy)
