# Supplementary material for: Artificial FLOwering plants in Reducing Anxiety and depressive symptoms following Acute Coronary Syndromes (A-FLORA-ACS): a randomised controlled trial
Source: Springer Nature journal article supplement (doi:10.1007/s00380-018-1314-2), 2018-12-11
Supplement: MOESM2 [file 16332362]

**Hospital Anxiety and Depression Scale (HADS)**

**Tick the box beside the reply that is closest to how you have been feeling in the past week.**

**Don’t take too long over you replies: your immediate is best.**

| D | A |  | D | A |  |
| --- | --- | --- | --- | --- | --- |
|  |  | I feel tense or 'wound up': |  |  | I feel as if I am slowed down: |
|  | 3 | Most of the time | 3 |  | Nearly all the time |
|  | 2 | A lot of the time | 2 |  | Very often |
|  | 1 | From time to time, occasionally | 1 |  | Sometimes |
|  | 0 | Not at all | 0 |  | Not at all |
|  |  |  |  |  |  |
|  |  | I still enjoy the things I used to enjoy: |  |  | I get a sort of frightened feeling like 'butterflies' in the stomach: |
| 0 |  | Definitely as much |  | 0 | Not at all |
| 1 |  | Not quite so much |  | 1 | Occasionally |
| 2 |  | Only a little |  | 2 | Quite Often |
| 3 |  | Hardly at all |  | 3 | Very Often |
|  |  |  |  |  |  |
|  |  | I get a sort of frightened feeling as if  something awful is about to happen: |  |  | I have lost interest in my appearance: |
|  | 3 | Very definitely and quite badly | 3 |  | Definitely |
|  | 2 | Yes, but not too badly | 2 |  | I don't take as much care as I should |
|  | 1 | A little, but it doesn't worry me | 1 |  | I may not take quite as much care |
|  | 0 | Not at all | 0 |  | I take just as much care as ever |
|  |  |  |  |  |  |
|  |  | I can laugh and see the funny side of things: |  |  | I feel restless as I have to be on the move: |
| 0 |  | As much as I always could |  | 3 | Very much indeed |
| 1 |  | Not quite so much now |  | 2 | Quite a lot |
| 2 |  | Definitely not so much now |  | 1 | Not very much |
| 3 |  | Not at all |  | 0 | Not at all |
|  |  | Worrying thoughts go through my mind: |  |  | I look forward with enjoyment to things: |
|  | 3 | A great deal of the time | 0 |  | As much as I ever did |
|  | 2 | A lot of the time | 1 |  | Rather less than I used to |
|  | 1 | From time to time, but not too often | 2 |  | Definitely less than I used to |
|  | 0 | Only occasionally | 3 |  | Hardly at all |
|  |  |  |  |  |  |
|  |  | I feel cheerful: |  |  | I get sudden feelings of panic: |
| 3 |  | Not at all |  | 3 | Very often indeed |
| 2 |  | Not often |  | 2 | Quite often |
| 1 |  | Sometimes |  | 1 | Not very often |
| 0 |  | Most of the time |  | 0 | Not at all |
|  |  |  |  |  |  |
|  |  | I can sit at ease and feel relaxed: |  |  | I can enjoy a good book or radio or TV program: |
|  | 0 | Definitely | 0 |  | Often |
|  | 1 | Usually | 1 |  | Sometimes |
|  | 2 | Not Often | 2 |  | Not often |
|  | 3 | Not at all | 3 |  | Very seldom |

Please check you have answered all the questions

Total score: Depression (D) ___________ Anxiety (A) ______________

Scoring:

0-7= Normal 8-10 = Borderline abnormal (borderline case) 11-21 = Abnormal (case)
